# Supplementary material for: Reduced graphene oxide as a water, carbon dioxide and oxygen barrier in plasticized poly(vinyl chloride) films
Source: Royal Society of Chemistry journal article supplement (doi:10.1039/c8ra03080d), 2018-01-01
Supplement: c8ra03080d1.pdf [file c8ra03080d1.pdf]

## Supplementary Information

### Reduced Graphene Oxide as Water, Carbon Dioxide and Oxygen Barrier in Plasticized Poly(vinyl chloride) Films

*Ngoc Minh Nguyen Huynh*<sup>a</sup>, *Zhanna A. Boeva*<sup>a,\*</sup>, *Jan-Henrik Smått*<sup>b</sup>, *Markus Pesonen*<sup>c</sup>,  
*Tom Lindfors*<sup>a,\*</sup>

Åbo Akademi University, Faculty of Science and Engineering, <sup>a</sup> Laboratory of Analytical Chemistry (Johan Gadolin Process Chemistry Centre, PCC), <sup>b</sup> Laboratory of Physical Chemistry and <sup>c</sup> Physics (belonging both to Center for Functional Materials, FUNMAT),  
20500 Åbo, Finland

**Table S1.** Atomic percentages (%) of elements in GO and RGO determined with EDXA.

|     | C      | O          | Si          | S           | K           | Mn          | I         | C:O ratio   |
|-----|--------|------------|-------------|-------------|-------------|-------------|-----------|-------------|
| GO  | 56 ± 1 | 42.3 ± 0.4 | 0.20 ± 0.01 | 1.12 ± 0.03 | 0.16 ± 0.02 | 0.11 ± 0.02 | -         | 1.32 ± 0.04 |
| RGO | 79 ± 2 | 12.4 ± 0.2 | 0.33 ± 0.04 | -           | -           | -           | 8.2 ± 0.1 | 6.4 ± 0.3   |

\* jboyeveva@gmail.com (Zhanna A. Boeva); +358 2 2154419, tom.lindfors@abo.fi (Tom Lindfors)

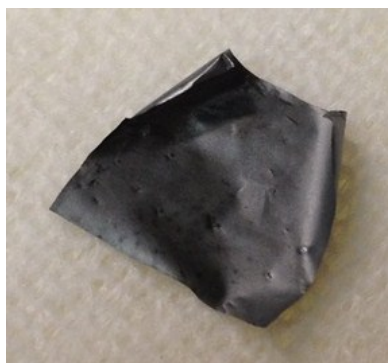

**Fig. S1.** Image of the 10  $\mu\text{m}$  thick RGO film. We straightened and cut the film to 10 mm  $\times$  10 mm before we applied it as a barrier layer in the plasticized PVC films.

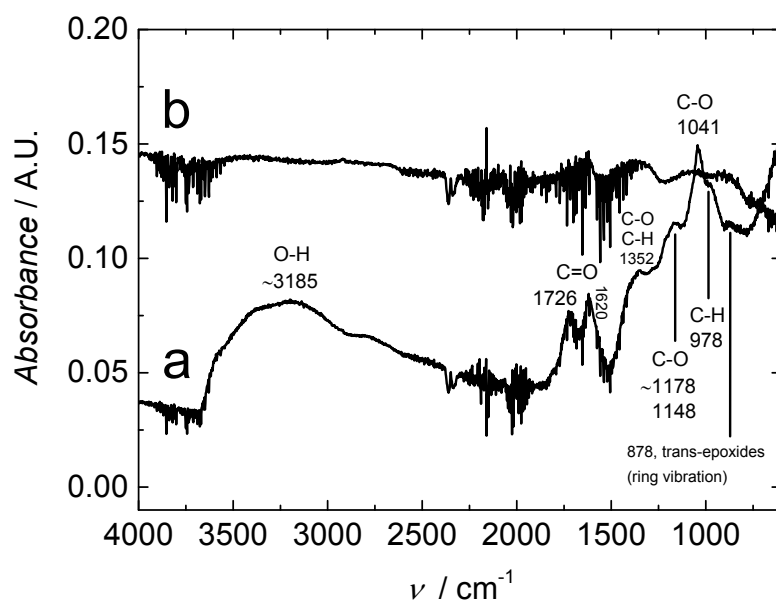

**Fig. S2.** The FTIR spectra of (a) GO and (b) RGO.

References to the vibrational bands: G. Socrates, *Infrared and Raman Characteristic Group Frequencies, Tables and Charts*, 3rd ed., John Wiley & Sons, Ltd: Chichester, 2001

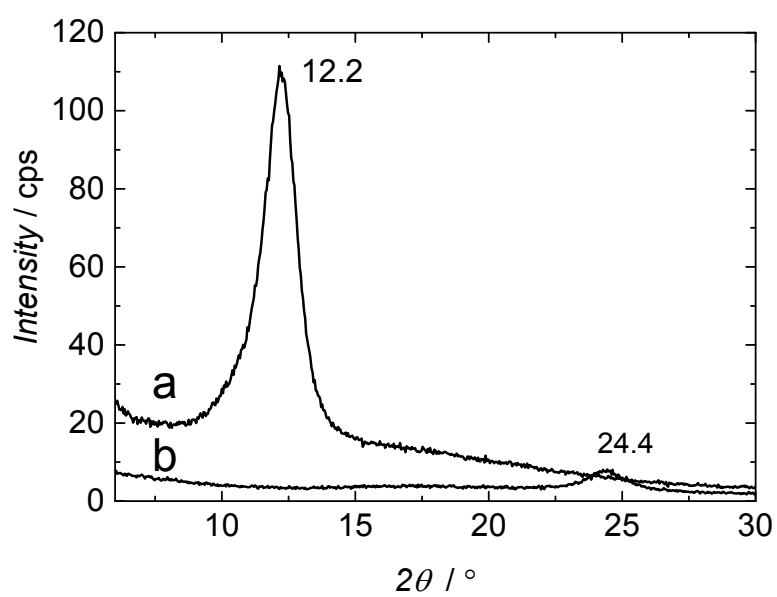

**Fig. S3.** XRD patterns of (a) GO and (b) RGO.

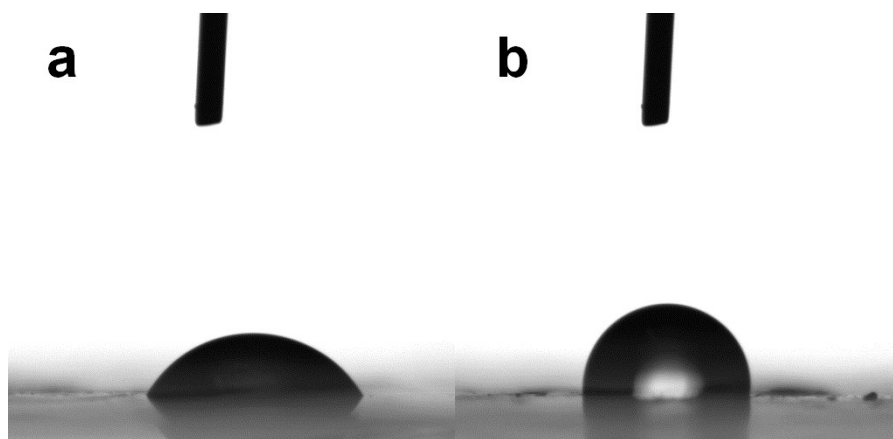

**Fig. S4.** Water contact angles of (a) GO ( $58\pm 3^\circ$ ) and (b) RGO ( $95\pm 1^\circ$ ).

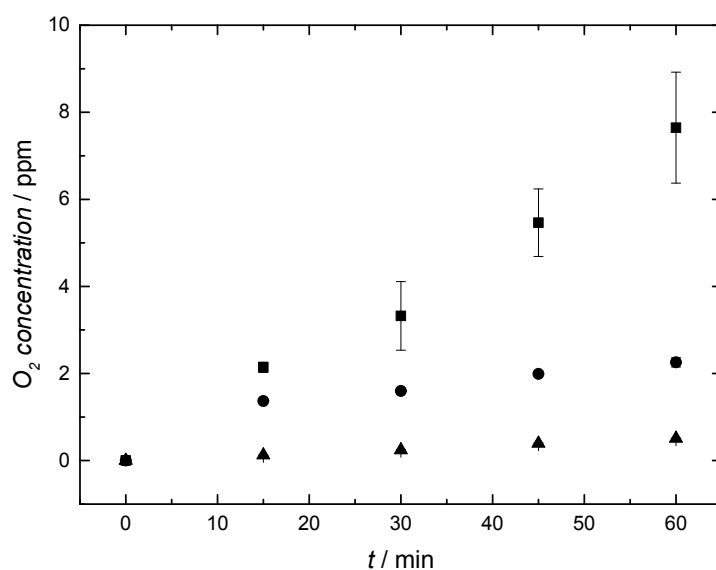

**Fig. S5.** Oxygen diffusion through the plasticized PVC membrane with (▲) and without (●) the RGO barrier layer. We carried out the control experiment (■) in the absence of a plasticized PVC membrane between the source and the receiving compartments of the oxygen measuring cell. Both compartments were filled with deionized water in all measurements.
